# Supplementary material
Source: Springer Nature journal article supplement (https://www.springermedizin.de/resource/supplementary/13014_2011_488_MOESM3_ESM.pdf/9633550)

**Survival without new anterior pituitary deficit**

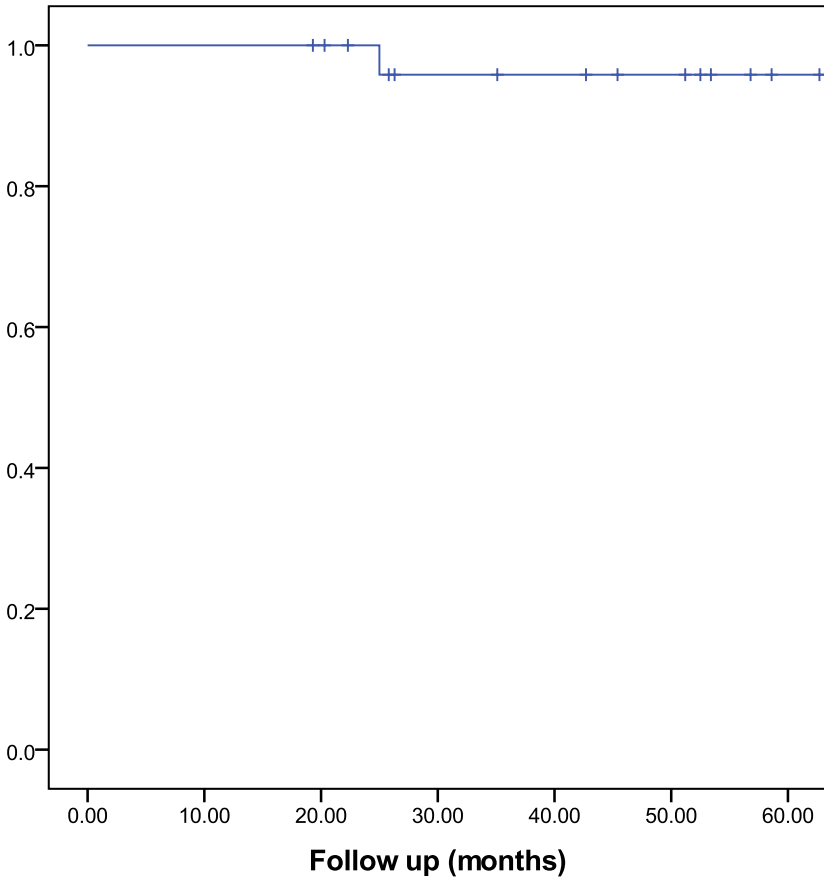

Supplement: MOESM3 [file 9633550]
